# Supplementary material for: UHPLC-MS/MS combined with microdialysis for simultaneous determination of nicotine and neurotransmitter metabolites in the rat hippocampal brain region: application to pharmacokinetic and pharmacodynamic study
Source: Royal Society of Chemistry journal article supplement (doi:10.1039/d4ay00522h), 2024-01-01
Supplement: d4ay00522h1.pdf [file d4ay00522h1.pdf]

Supporting information for

**UHPLC-MS/MS combined with microdialysis for simultaneous  
determination of nicotine and neurotransmitter metabolites in the rat  
hippocampal brain region: application to pharmacokinetic and  
pharmacodynamic study**

Mingyu Zhu<sup>a,b,c</sup>, Lili Cui<sup>b,c</sup>, Guanglin Liu<sup>b,c</sup>, Pengpeng Yu<sup>b,c</sup>, Qingyuan Hu<sup>b,c</sup>, Huan Chen<sup>\*b,c</sup>, and  
Hongwei Hou<sup>\*b,c</sup>

<sup>a</sup>Institute of Biomedical Engineering, College of Life Sciences, Qingdao University, Qingdao,  
266071, China

<sup>b</sup>China National Tobacco Quality Supervision and Test Center, key Laboratory of Tobacco  
Biological Effects, Zhengzhou, 450001, China

<sup>c</sup> Beijing Life Science Academy, Beijing, 100101, China

\* <sup>b,c</sup> Huan Chen, E-mail: [hunny\\_ch@163.com](mailto:hunny_ch@163.com); Tel: +86-0371-67672597

\* <sup>b,c</sup> Hongwei Hou, E-mail: [qsfetc@163.com](mailto:qsfetc@163.com); Tel: +86-0371-67672727

Table.S1 Comparison of the LOD and LOQ of the proposed method with other methods.

| Analyte | LOD (ng/mL) | LOQ (ng/mL) | LOD <sup>[1]</sup> (ng/mL) | LOQ <sup>[1]</sup> (ng/mL) | LOD <sup>[2]</sup> (ng/mL) | LOQ <sup>[2]</sup> (ng/mL) | LOD <sup>[3]</sup> (ng/mL) | LOQ <sup>[3]</sup> (ng/mL) | LOD <sup>[4]</sup> (ng/mL) | LOQ <sup>[4]</sup> (ng/mL) |
|---------|-------------|-------------|----------------------------|----------------------------|----------------------------|----------------------------|----------------------------|----------------------------|----------------------------|----------------------------|
| DA      | 0.05        | 0.2         | -                          | -                          | 0.05                       | 0.25                       | 0.20                       | 0.50                       | 0.05                       | 0.25                       |
| DOPAC   | 0.02        | 0.05        | -                          | -                          | --                         | --                         | 2.50                       | 5.00                       | -                          | -                          |
| L-DOPA  | 0.01        | 0.02        | -                          | -                          | 0.26                       | 0.50                       | -                          | -                          | 0.50                       | 0.75                       |
| 3-MT    | 0.01        | 0.04        | -                          | -                          | 0.25                       | 0.75                       | -                          | -                          | 0.10                       | 0.25                       |
| HVA     | 0.01        | 0.05        | -                          | -                          | 17.1                       | 50.0                       | 15.0                       | 450                        | -                          | -                          |
| 5-HT    | 0.004       | 0.01        | -                          | -                          | 0.07                       | 0.25                       | 0.01                       | 0.03                       | 0.01                       | 0.05                       |
| 5-HIAA  | 0.004       | 0.01        | -                          | -                          | 0.16                       | 0.50                       | 1.00                       | 3.00                       | 0.10                       | 0.25                       |
| NE      | 0.01        | 0.03        | -                          | -                          | 0.96                       | 2.00                       | 1.00                       | 3.00                       | 0.75                       | 2.00                       |
| E       | 0.02        | 0.10        | -                          | -                          | -                          | -                          | 0.02                       | 0.05                       | -                          | -                          |
| GABA    | 0.01        | 0.03        | -                          | -                          | 0.008                      | 0.03                       | 30.0                       | 100                        | 0.75                       | 1.00                       |
| GA      | 0.10        | 0.20        | -                          | -                          | 0.02                       | 1.25                       | -                          | -                          | -                          | -                          |
| ACh     | 0.004       | 0.01        | -                          | -                          | 0.03                       | 0.10                       | -                          | -                          | 0.03                       | 0.05                       |
| Nic     | 0.01        | 0.03        | 0.01                       | 0.04                       | -                          | -                          | -                          | -                          | -                          | -                          |
| Cot     | 0.01        | 0.02        | 0.02                       | 0.05                       | -                          | -                          | -                          | -                          | -                          | -                          |
| NorNic  | 0.02        | 0.10        | 0.03                       | 0.09                       | -                          | -                          | -                          | -                          | -                          | -                          |
| NorCot  | 0.01        | 0.03        | 0.02                       | 0.07                       | -                          | -                          | -                          | -                          | -                          | -                          |
| NNO     | 0.01        | 0.02        | 0.02                       | 0.05                       | -                          | -                          | -                          | -                          | -                          | -                          |
| CNO     | 0.02        | 0.10        | 0.03                       | 0.10                       | -                          | -                          | -                          | -                          | -                          | -                          |
| 3OH-Cot | 0.03        | 0.10        | 0.04                       | 0.14                       | -                          | -                          | -                          | -                          | -                          | -                          |
| NicGlu  | 0.01        | 0.04        | 0.08                       | 0.27                       | -                          | -                          | -                          | -                          | -                          | -                          |

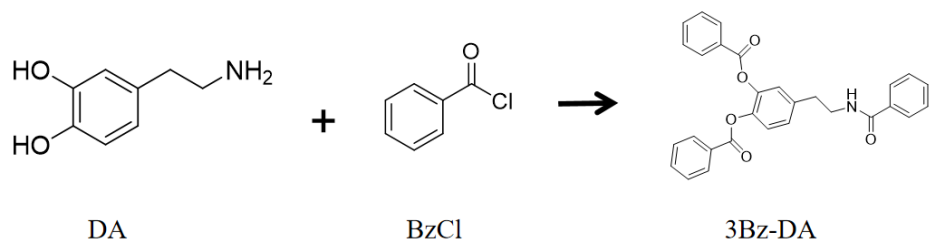

Fig.S1 Chemical formula of the reaction of DA with benzoyl chloride

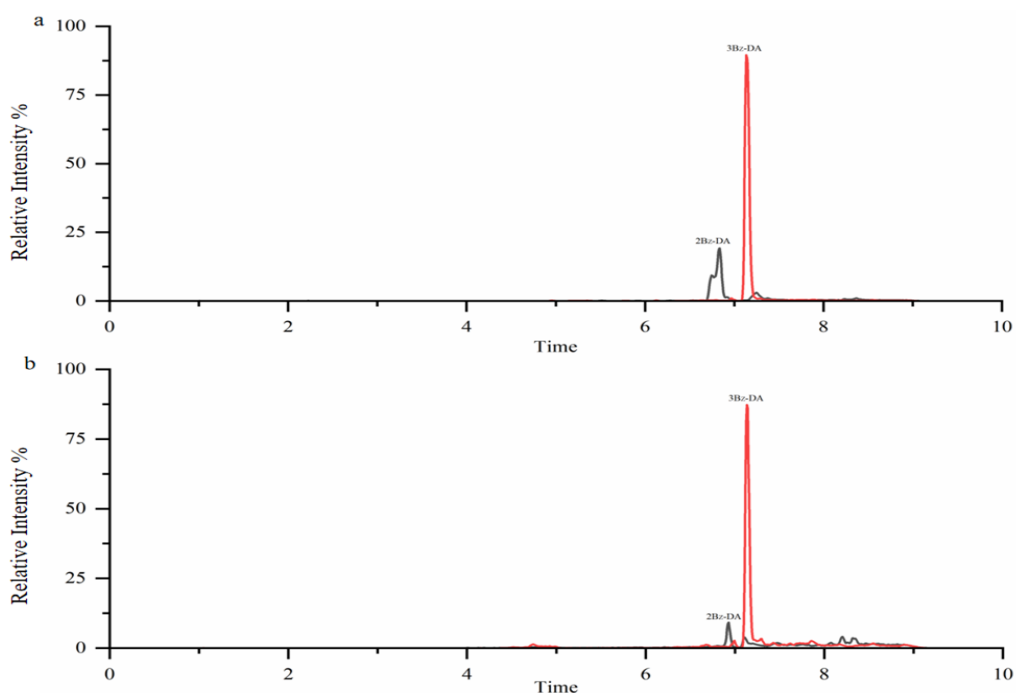

Fig.S2 (a)Chromatograms of 3Bz-DA and 2Bz-DA under the condition of 2:1:1;  
 (b)Chromatograms of 3Bz-DA and 2Bz-DA under the condition of 1:2:2.

#### References:

- [1] XU Y, ZHANG Q, LI P, et al. Nicotine Pharmacokinetics in Rat Brain and Blood by Simultaneous Microdialysis, Stable-Isotope Labeling, and UHPLC-HRMS: Determination of Nicotine Metabolites [J]. *Analytical Chemistry*, 2019, 91(4): 2916-22.
- [2] BECKER S, SCHULZ A, KREYER S, et al. Sensitive and simultaneous quantification of 16 neurotransmitters and metabolites in murine microdialysate by fast liquid chromatography-tandem mass spectrometry [J]. *Talanta*, 2023, 253: 123965.
- [3] WANG Y C, ZHENG R J, WU P P, et al. Determination of Multiple Neurotransmitters through LC-MS/MS to Confirm the Therapeutic Effects of *Althaea rosea* Flower on TTX-Intoxicated Rats [J]. *Molecules*, 2023, 28(10).
- [4] HELMSCHRODT C, BECKER S, PERL S, et al. Development of a fast liquid chromatography-tandem mass spectrometry method for simultaneous quantification of neurotransmitters in murine microdialysate [J]. *Analytical and Bioanalytical Chemistry*, 2020, 412(28): 7777-87.
